# Supplementary material
Source: Springer Nature journal article supplement (https://www.springermedizin.de/resource/supplementary/12916_2009_228_MOESM4_ESM.pdf/9599440)

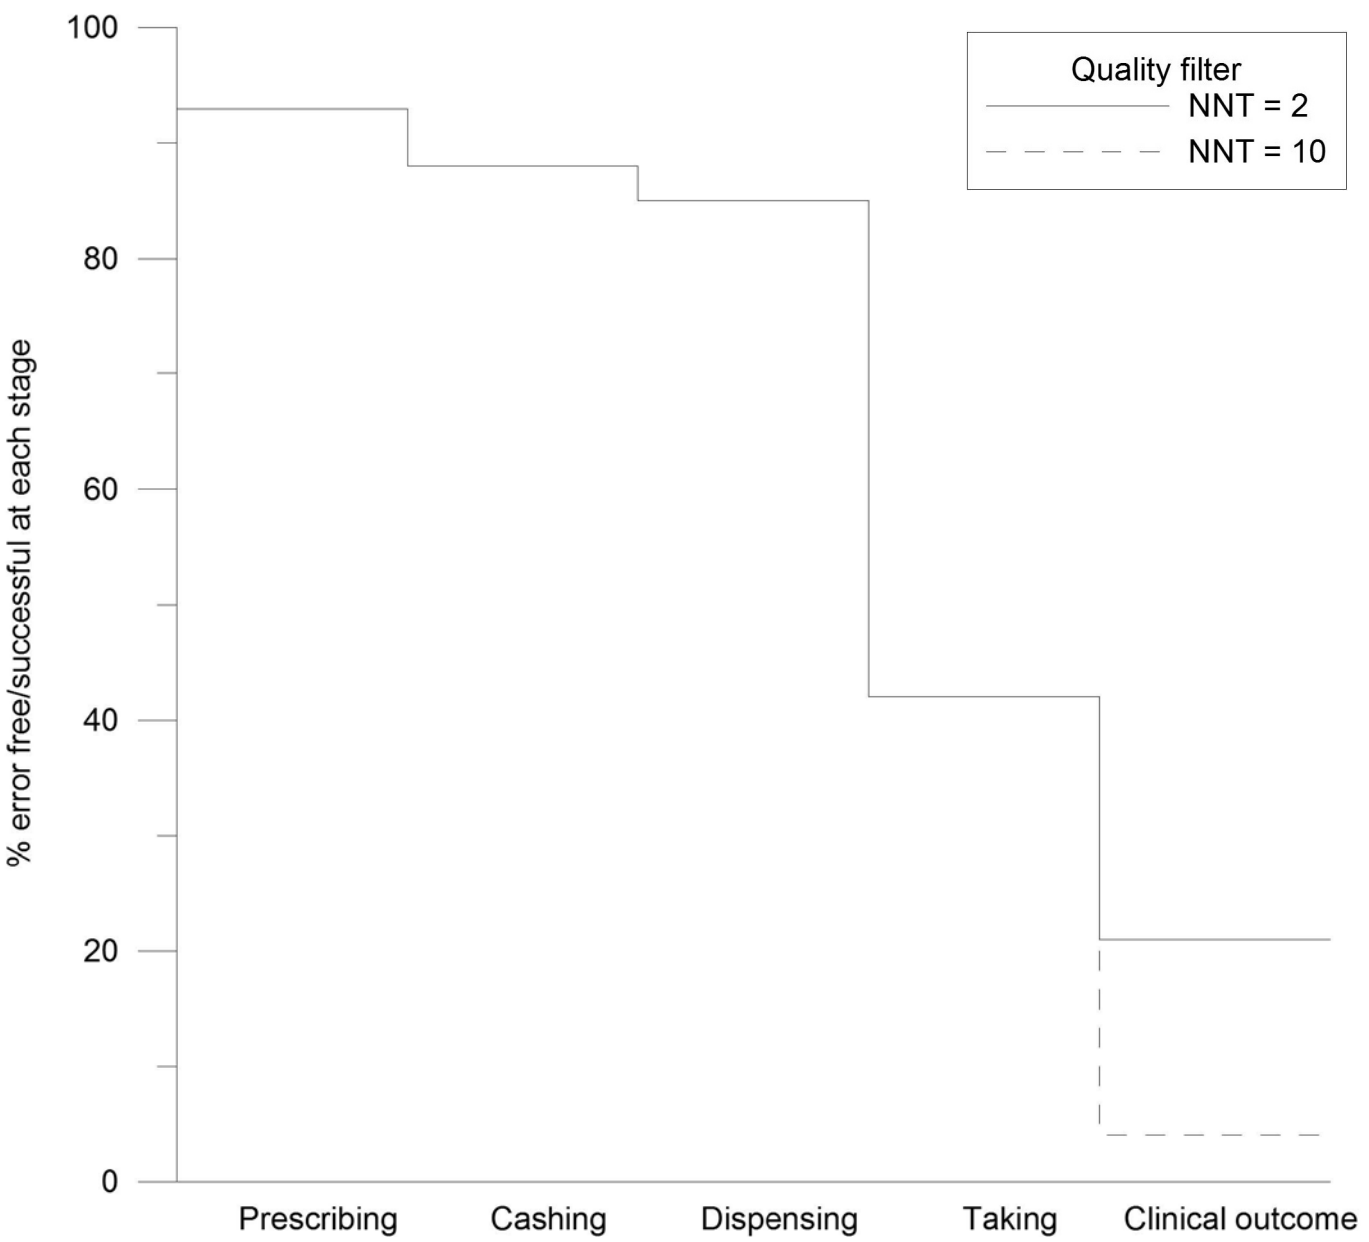

Supplement: MOESM4 [file 9599440]
